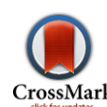

# Impact of ECG Findings and Process-Of-Care Characteristics on the Likelihood of Not Receiving Reperfusion Therapy in Patients with ST-Elevation Myocardial Infarction: Results of a Field Evaluation

Kevin A. Brown<sup>1</sup>, Laurie J. Lambert<sup>1\*</sup>, James M. Brophy<sup>2</sup>, James Nasmith<sup>3</sup>, Stéphane Rinfret<sup>4</sup>, Eli Segal<sup>5,6</sup>, Simon Kouz<sup>7</sup>, Dave Ross<sup>6,8,9</sup>, Richard Harvey<sup>10</sup>, Sébastien Maire<sup>11</sup>, Lucy J. Boothroyd<sup>1</sup>, Peter Bogaty<sup>1,4</sup>

**1** Institut national d'excellence en santé et en services sociaux (INESSS), Montréal, Québec, Canada, **2** McGill University Health Center, Montréal, Québec, Canada, **3** St. Paul's Hospital, Vancouver, British Columbia, Canada, **4** Institut universitaire de cardiologie et de pneumologie de Québec, Québec, Québec, Canada, **5** Sir Mortimer B. Davis Jewish General Hospital, Montréal, Québec, Canada, **6** Corporation d'Urgences-santé, Montréal, Québec, Canada, **7** Centre hospitalier régional de Lanaudière, Joliette, Québec, Canada, **8** Services préhospitaliers d'urgence en Montérégie, Longueuil, Québec, Canada, **9** Département de médecine préhospitalière, Hôpital Sacré-Cœur de Montréal, Montréal, Québec, Canada, **10** Université de Sherbrooke, Sherbrooke, Québec, Canada, **11** Centre hospitalier affilié universitaire Hôtel-Dieu de Lévis, Lévis, Québec, Canada

## Abstract

**Background:** Many patients with ST-elevation myocardial infarction (STEMI) do not receive reperfusion therapy and are known to have poorer outcomes. We aimed to perform the first population-level, integrated analysis of clinical, ECG and hospital characteristics associated with non-receipt of reperfusion therapy in patients with STEMI.

**Methods and Results:** This systematic evaluation of STEMI care in 82 hospitals in Quebec included all patients with a discharge diagnosis of myocardial infarction, presenting with characteristic symptoms and an ECG showing STEMI as attested by at least one of two study cardiologists or left bundle branch block (LBBB). Excluding LBBB, an ECG was considered a *definite* STEMI diagnosis if both cardiologists scored 'certain STEMI' and *ambiguous* if one scored 'uncertain' or 'not STEMI'. Centers were classified according to accessibility to primary percutaneous coronary intervention (PPCI): 1) on-site PPCI; 2) routine transfer for PPCI; 3) varying mix of PPCI transfer and on-site fibrinolysis; and 4) routine on-site fibrinolysis. Of 3730 STEMI/LBBB patients, 812 (21.8%) did not receive reperfusion therapy. In multivariate analysis, likelihood of no reperfusion therapy was a function of PPCI accessibility (odds ratio [OR] for fibrinolysis versus PPCI centers = 3.1; 95% CI: 2.2–4.4), presence of LBBB (OR = 24.1; 95% CI: 17.8–32.9) and an ECG ambiguous for STEMI (OR = 4.1; 95% CI: 3.3–5.1). When the ECG was ambiguous, likelihood of no reperfusion therapy was highest in hospitals most distant from PPCI centers.

**Conclusions:** ECG diagnostic ambiguity, LBBB and PPCI accessibility are important predictors of not receiving reperfusion therapy, suggesting opportunities for improving outcomes.

**Citation:** Brown KA, Lambert LJ, Brophy JM, Nasmith J, Rinfret S, et al. (2014) Impact of ECG Findings and Process-Of-Care Characteristics on the Likelihood of Not Receiving Reperfusion Therapy in Patients with ST-Elevation Myocardial Infarction: Results of a Field Evaluation. PLoS ONE 9(8): e104874. doi:10.1371/journal.pone.0104874

**Editor:** Vincenzo Lionetti, Scuola Superiore Sant'Anna, Italy

**Received:** March 4, 2014; **Accepted:** July 4, 2014; **Published:** August 21, 2014

**Copyright:** © 2014 Brown et al. This is an open-access article distributed under the terms of the Creative Commons Attribution License, which permits unrestricted use, distribution, and reproduction in any medium, provided the original author and source are credited.

**Data Availability:** The authors confirm that, for approved reasons, some access restrictions apply to the data underlying the findings. The data come from several hospital and medicoadministrative database sources, and linkage was performed with approval from Quebec's Access to Information Commission. Request may be sent to: laurie.lambert@inesss.qc.ca.

**Funding:** This study was supported by an operating grant from the Quebec Ministry of Health. The funder had no role in study design, data collection and analysis, decision to publish, or preparation of the manuscript.

**Competing Interests:** The authors have declared that no competing interests exist.

\* Email: laurie.lambert@inesss.qc.ca

## Introduction

The standard of care for patients presenting with ST-elevation myocardial infarction (STEMI) is immediate reperfusion with primary percutaneous coronary intervention (PPCI) or fibrinolysis [1,2]. The prognosis of patients with STEMI is better if these interventions can be performed expeditiously (for PPCI, door-to-device within 90 minutes and for fibrinolysis, door-to-needle within 30 minutes). When both options are readily available, PPCI is favored if timely. While many clinical studies have compared

choice of treatment and examined timeliness of reperfusion, a more important healthcare gap may be the substantial proportion of patients with STEMI who do not receive any reperfusion therapy at all [3]. Registry data suggest that as many as 1 in 3 patients with STEMI receive neither PPCI nor fibrinolysis and that these patients have a mortality risk several times greater than patients who do receive reperfusion treatment [4–7].

Most previous investigations of non-receipt of reperfusion therapy have focused on patient clinical features. Less is known about the role of processes of care, such as a hospital's

predominant reperfusion strategy and access to PPCI. Among centers that receive patients with STEMI, there are those that exclusively treat with on-site PPCI and others at great distances from PPCI facilities that can only treat with fibrinolysis. Other centers without on-site cardiac catheterization laboratories exclusively transfer their patients to nearby sites for PPCI, and a fourth type of center uses a varying mix of transfer for PPCI and on-site fibrinolysis. Besides patient clinical factors, these distinct clinical care environments may influence who receives and who does not receive reperfusion treatment. Less is also known about the impact on non-receipt of reperfusion therapy of electrocardiograms (ECGs) that show left bundle branch block (LBBB) or that do not present a clear-cut STEMI diagnosis. Our study objectives were to ascertain the incidence and predictors of non-receipt of reperfusion therapy in different types of hospitals, with particular attention to the presence of 'difficult-to-interpret' ECGs.

## Methods

### Ethics Statement

Approval for the study was obtained from the Quebec Commission for Access to Information ethics board, which waived patient consent as neither patient intervention nor contact was involved.

### Study Design

Our field evaluation was an observational cohort study constituted during two 6-month periods – the first from October 1, 2006 to March 31, 2007 and the second from October 1, 2008 to March 31, 2009 – and included all acute care hospitals in Quebec, Canada ( $n=80$  in the first and  $n=82$  in the second period) that treated at least 30 patients with acute myocardial infarction (AMI) in the previous year. Together, these centers treat more than 95% of all patients with AMI in Quebec (population 7.8 million persons in 2008). The non-consecutive study periods were chosen for periodic auditing purposes and were representative of regular (rather than summer) staffing.

### Data Collection and Patient Identification

The data collection process has been previously detailed in a study that focused on treatment delays and clinical outcomes among STEMI patients who were sent for PPCI or received fibrinolytic therapy in the 2006–7 period [8]. In summary, a certified medical record librarian was designated at each hospital and individually trained for this project. A standardized data collection process was used to abstract all information from medical charts and enter data onto a secure centralized Web site [9]. Using an algorithm (Figure 1), we included all STEMI patients who did and did not receive reperfusion therapy by identifying all patients in the study periods who had a final hospital discharge diagnosis of AMI (ICD-10 codes: I21–I22.9; I24) and presented with characteristic symptoms of acute myocardial ischemia at first medical contact. All patients included were: 1) treated with fibrinolysis within 4 hours of triage, or 2) sent for PPCI within 4 hours of triage, or 3) were not in groups 1 or 2 but had mention of STEMI or LBBB in their medical chart. In addition, all patients had to have a presenting ECG showing either 1) diagnostic ST-segment elevation or 2) LBBB according to at least one of the two cardiologists at the study core laboratory.

### Variables and Outcomes

For the purposes of this study, patients with retrospectively validated ECG eligibility for reperfusion treatment who neither received fibrinolysis nor were sent to a PPCI laboratory within 4

hours of triage were considered to have not received reperfusion therapy. We set this particular time window since pilot tests showed it was highly unlikely for patients with a first ECG showing STEMI to be treated with reperfusion therapy after more than a 4-hour delay. Clinical factors examined were age, sex, systolic blood pressure at triage, heart rate at first in-hospital ECG, and symptom duration to triage. For the ECG interpretation variable, patients without LBBB were categorized as 1) a 'definite' STEMI diagnosis when both study cardiologists agreed that STEMI was present: yes/yes; or 2) an 'ambiguous' STEMI diagnosis, when only one cardiologist felt STEMI was present, while the other scored not STEMI or was uncertain: yes/no or yes/uncertain). The first ECG was also classified according to presence or absence of anterior STEMI for patients without LBBB.

The acute care hospitals were grouped into 4 distinct mutually exclusive categories based on reperfusion strategy [10]: 1) PPCI centers (i.e., the predominant  $\geq 95\%$  reperfusion treatment was on-site PPCI); 2) routine transfer PPCI centers (i.e., non-PPCI centers that predominantly  $\geq 95\%$  transferred their STEMI patients for PPCI); 3) mixed (non-PPCI) centers that used both transfer for PPCI and on-site fibrinolysis as reperfusion strategies (with a mean of 64% of STEMI patients being transferred for PPCI and 34% receiving fibrinolysis); and 4) routine fibrinolysis centers (i.e., non-PPCI centers that predominantly  $\geq 95\%$  treated their STEMI patients with fibrinolysis). There is no pre-hospital fibrinolysis in Quebec. We calculated the median distances of the three non-PPCI types of centers to the nearest PPCI facility as an index of PPCI accessibility. Other process-of-care variables included triage outside of regular work hours (6:00 p.m. to 7:59 a.m., 7 days/week), triage on the weekend, and arrival at first emergency room by self-transport (versus ambulance). Volume of STEMI during the 6-month study periods was categorized as low ( $\leq 10$ ), medium (11–25) and high ( $>25$ ) admissions.

Patient comorbidities were ascertained via Quebec's administrative hospital discharge database whose reliability has been shown [11]. The recorded principal diagnosis and up to 15 secondary diagnoses were examined for the index hospital admission as well as for all other hospital admissions during the 5 years prior to the index. Only diagnoses considered chronic were ascertained from the index admission, to avoid misclassifying possible acute complications as comorbidities. The Charlson comorbidity index was calculated for each patient and categorized as 0, 1, 2, 3, 4, and 5 or more [12].

### Statistical Analysis

The distribution of demographic and clinical factors, ECG characteristics, and hospital variables was compared in patients who received reperfusion therapy versus patients who did not, using Pearson's chi-square test for categorical variables or the Kruskal-Wallis test for continuous variables. A crude odds ratio (OR) and the 95% Wald confidence interval (CI) for the association between each variable and non-receipt of reperfusion therapy were calculated.

To develop a parsimonious logistic regression model for the prediction of non-receipt of reperfusion therapy, we used a forward selection procedure beginning with a model that included *a priori*, age, systolic blood pressure, heart rate, type of center and study period. The candidate variable (Table 1) with the highest predictive value was then added incrementally, until additional variables failed to improve the model Akaike Information Criterion. In order to ensure that our inferences were equally valid for both periods, we measured the model fit for both study periods using the c-statistic [13]. As a sensitivity analysis, we also

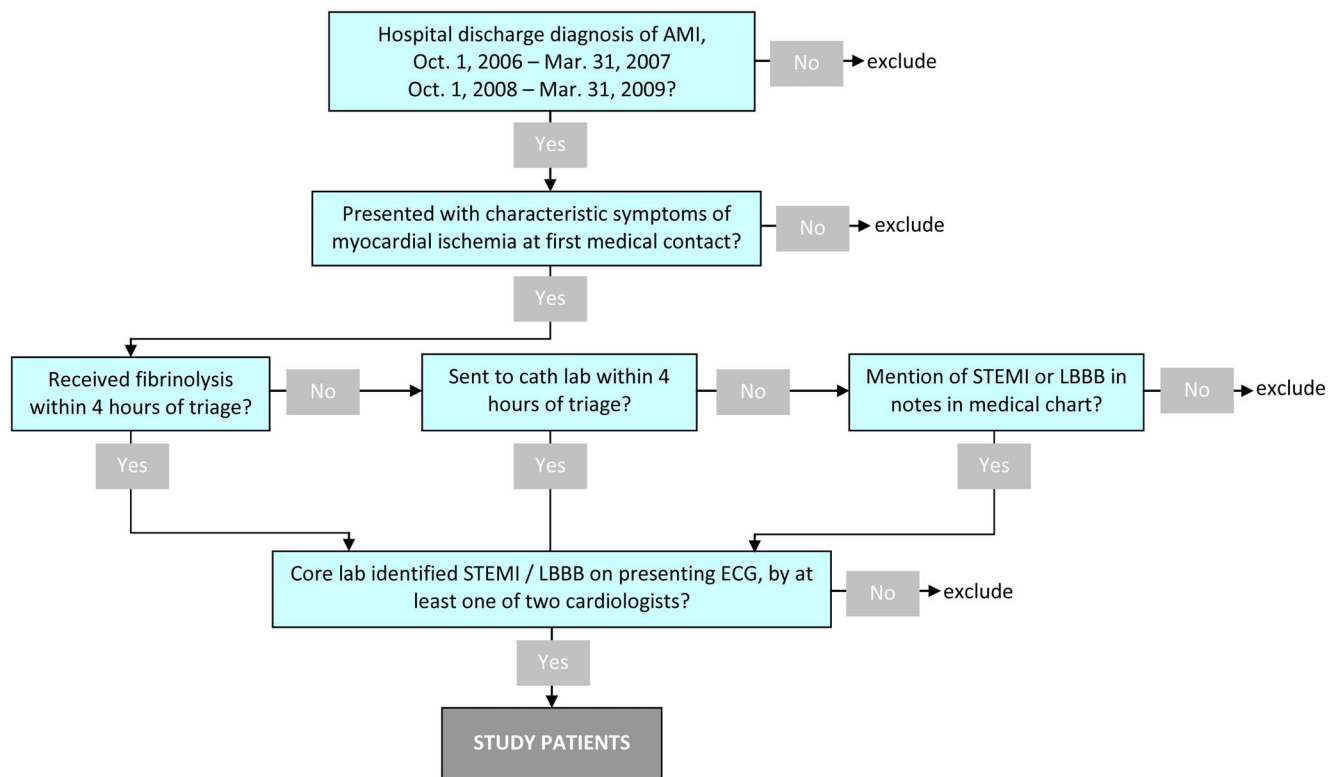

**Figure 1. Algorithm to identify study patients.** Abbreviations: AMI: acute myocardial infarction. cath lab: cardiac catheterization laboratory. STEMI: ST-segment elevation myocardial infarction. LBBB: left bundle branch block. ECG: electrocardiogram. doi:10.1371/journal.pone.0104874.g001

ran a multilevel logistic regression with the same fixed effects as the multivariate model above, but with the addition of 82 random-effects intercepts corresponding to each hospital center.

In order to investigate the differences across centers in terms of patient factors associated with non-receipt of reperfusion therapy, we applied the same multivariate model developed for the overall cohort (minus the variable for type of center) to patients presenting to each of the 4 hospital types. We used meta-analytic techniques in order to consider the differences in effects across the 4 center types; specifically, we used Cochran's  $Q$  statistic to assess the statistical significance of heterogeneity and Higgins'  $I^2$  statistic to assess the magnitude of heterogeneity [14]. We classified heterogeneity as low ( $I^2 \leq 33\%$ ), medium ( $33\% < I^2 \leq 66\%$ ) or high ( $I^2 > 66\%$ ). We report two-sided  $p$ -values, and considered the threshold for statistical significance to be 5%. Statistical analyses were performed using R software version 2.15 [15].

## Results

We examined the medical charts of 14,781 patients who presented to an emergency room with characteristic symptoms in the two study periods and who had a final discharge diagnosis of AMI. On the basis of the algorithm and the core-laboratory analysis of the first presenting ECG, 3730 (25.2%) of these patients were classified as having STEMI/LBBB, of whom 1897 presented in the first period and 1833 presented in the second. Of the 3730 patients, 465 patients (12.5%) had LBBB, 2342 patients (62.8%) had a definite STEMI ECG and 923 patients (24.7%) had an ECG considered ambiguous for STEMI.

Of all 3730 patients, the proportions presenting to the 4 types of hospitals were 29.7% to PPCI centers, 33.0% to transfer PPCI

centers, 26.7% to mixed centers and 10.6% to fibrinolysis centers. Median distances to the nearest PPCI center were 20 km (inter-quartile range, IQR: 7–39) for transfer PPCI centers, 77 km (IQR: 23–126) for mixed centers, and 307 km (IQR: 131–488) for fibrinolysis centers ( $p < 0.001$ ). The proportions presenting with an ambiguous STEMI ECG (and no LBBB) were 29.1% in PPCI centers, 29.8% in transfer PPCI centers, 28.1% in mixed centers and 21.9% in fibrinolysis centers ( $p = 0.04$ ). The proportion of STEMI/LBBB patients who neither received fibrinolysis nor were sent for PPCI within 4 hours of emergency room triage was 21.8% overall, decreasing from 23.5% to 20.0% across the study periods ( $p = 0.009$ ).

## Univariate Predictors of Non-Receipt of Reperfusion Therapy (Table 1)

Patients with STEMI/LBBB who did not receive reperfusion therapy were significantly older, more likely to be female, more often had a heart rate  $> 100/\text{min}$ , and had a longer duration of symptoms before presentation compared with those who received reperfusion therapy. Each 5-year increase in age was associated with greater likelihood of no reperfusion therapy (OR = 1.41; 95% CI: 1.36–1.46). Cardiac and non-cardiac comorbidities were more frequent in patients who did not receive reperfusion treatment (not shown in Table); accordingly, the median Charlson comorbidity score was higher for those without reperfusion therapy ( $p < 0.001$ ).

LBBB was present in 45.2% (367/812) of patients not receiving reperfusion therapy, compared with 3.4% (98/2918) in patients who received reperfusion treatment (OR = 23.76; 95% CI: 18.66–30.43). Among patients without LBBB but with an ECG that was ambiguous for STEMI, the odds of not receiving reperfusion

**Table 1.** Univariate Predictors of Non-Receipt of Reperfusion Therapy (N = 3730).

| Description of Variables                 | Reperfusion Therapy (n = 2918) |      | No Reperfusion Therapy (n = 812) |      | Univariate Odds Ratio (95% CI) | p      |
|------------------------------------------|--------------------------------|------|----------------------------------|------|--------------------------------|--------|
|                                          | N                              | %    | N                                | %    |                                |        |
| Age (years), median (IQR)                | 60 (52–70)                     |      | 77 (63–84)                       |      | 1.41 (1.36–1.46) *             | <0.001 |
| Female sex                               | 725                            | 24.8 | 360                              | 44.3 | 2.41 (2.05–2.83)               | <0.001 |
| Heart rate >100 beats/min                | 328                            | 11.2 | 236                              | 29.1 | 3.24 (2.67–3.91)               | <0.001 |
| Systolic blood pressure $\geq$ 100 mm Hg | 2572                           | 88.1 | 729                              | 89.8 | 1.18 (0.92–1.53)               | 0.20   |
| Symptom duration >3 h                    | 844                            | 28.9 | 457                              | 56.3 | 3.16 (2.70–3.71)               | <0.001 |
| Left bundle branch block (LBBB)          |                                |      |                                  |      |                                |        |
| Absent                                   | 2820                           | 96.6 | 445                              | 54.8 | Reference                      |        |
| Present                                  | 98                             | 3.4  | 367                              | 45.2 | 23.73 (18.66–30.43)            | <0.001 |
| ECG Interpretation (no LBBB)             |                                |      |                                  |      |                                |        |
| Definite STEMI                           | 2154                           | 76.4 | 188                              | 42.2 | Reference                      |        |
| Ambiguous STEMI                          | 666                            | 23.6 | 257                              | 57.8 | 4.42 (3.60–5.44)               | <0.001 |
| Anterior MI (no LBBB)                    |                                |      |                                  |      |                                |        |
| Absent                                   | 1911                           | 67.8 | 299                              | 67.2 | Reference                      |        |
| Present                                  | 909                            | 32.2 | 146                              | 32.8 | 1.03 (0.83–1.27)               | 0.78   |
| Charlson comorbidity index, median (IQR) |                                |      |                                  |      |                                |        |
| Odds ratio per 1 point increment         | 1 (0–2)                        |      | 2 (0–4)                          |      | 1.67 (1.58–1.76)               | <0.001 |
| Triage outside of regular work hours     | 1302                           | 44.6 | 410                              | 50.5 | 1.27 (1.08–1.48)               | 0.003  |
| Triage on weekend                        | 865                            | 29.6 | 242                              | 29.8 | 1.01 (0.85–1.19)               | 0.93   |
| Arrival by self-transport                | 1043                           | 35.7 | 274                              | 33.7 | 0.92 (0.78–1.08)               | 0.29   |
| Center STEMI Volume                      |                                |      |                                  |      |                                |        |
| High (>25 admissions)                    | 2007                           | 68.8 | 506                              | 62.3 | Reference                      |        |
| Medium (11–25)                           | 665                            | 22.8 | 211                              | 26.0 | 1.26 (1.05–1.51)               |        |
| Low (10)                                 | 246                            | 8.4  | 95                               | 11.7 | 1.54 (1.18–1.97)               | <0.001 |
| Type of Center                           |                                |      |                                  |      |                                |        |
| PPCI center                              | 923                            | 31.6 | 185                              | 22.8 | Reference                      |        |
| Transfer PPCI center                     | 969                            | 33.2 | 262                              | 32.3 | 1.35 (1.10–1.66)               |        |
| Mixed center                             | 748                            | 25.6 | 248                              | 30.5 | 1.65 (1.34–2.05)               |        |
| Fibrinolysis center                      | 278                            | 9.5  | 117                              | 14.4 | 2.10 (1.60–2.74)               | <0.001 |

\*odds ratio for each 5-year age increment; CI: confidence interval; ECG: electrocardiogram; h: hours; IQR: interquartile range; LBBB: left bundle branch block; MI: myocardial infarction; min: minute; PPCI: primary percutaneous coronary intervention; STEMI: ST-elevation myocardial infarction.  
doi:10.1371/journal.pone.0104874.t001

therapy was 4.42 (95% CI: 3.60–5.44) times higher than in patients with an ECG that was a definite STEMI diagnosis.

The likelihood of non-receipt of reperfusion treatment varied significantly by accessibility to PPCI. Of 1108 STEMI/LBBB patients presenting directly to a PPCI center, 185 patients (16.7%) did not receive reperfusion therapy compared with 21.3% (262/1231) for transfer PPCI centers, 24.9% (248/996) for mixed centers, and 29.6% (117/395) for fibrinolysis centers ( $p < 0.001$ ). Other factors found to be associated with no reperfusion were lower center volume and triage outside of regular work hours.

### Multivariate Predictors of Non-Receipt of Reperfusion Therapy (Table 2)

In multivariate analysis, less accessibility to PPCI, LBBB and an ECG that was ambiguous for STEMI were associated with non-receipt of reperfusion therapy. The odds of not receiving reperfusion therapy were very similar for PPCI centers and centers that exclusively transferred their STEMI patients for PPCI. However, patients with STEMI/LBBB who presented to centers

that treated exclusively with fibrinolysis had 3-fold higher odds of not receiving reperfusion therapy. Patients presenting to mixed centers that were geographically closer to a PPCI facility than the exclusively fibrinolytic centers but further away than sites systematically transferring their patients for PPCI, had intermediate, 1.5-fold odds of not receiving therapy. The odds of not receiving reperfusion therapy were especially pronounced for patients who had an ECG ambiguous for STEMI (excluding LBBB; OR = 4.07; 95% CI: 3.25–5.12) and patients who presented with LBBB (OR = 24.10; 95% CI: 17.81–32.89).

Other factors in the multivariate model associated with no reperfusion treatment were: older age; female sex; higher systolic blood pressure ( $\geq 100$  mm Hg); higher heart rate ( $> 100$  beats/min); longer symptom duration; higher Charlson comorbidity index; self-transport to emergency room; and earlier observation period. Triage outside of regular work hours was borderline significant. Elevated c-statistics of 0.87 for the first study period and 0.89 for the second show that the model was consistently able to discriminate patients likely to receive reperfusion therapy from

**Table 2.** Multivariate Predictors of Non-Receipt of Reperfusion Therapy (N = 3730).

| Variable                                                        | Odds Ratio (95% CI) |
|-----------------------------------------------------------------|---------------------|
| Age (per 5-year increment)                                      | 1.21 (1.16–1.27)    |
| Female sex (versus male)                                        | 1.71 (1.37–2.14)    |
| Systolic blood pressure $\geq 100$ mm Hg (versus $< 100$ mm Hg) | 1.44 (1.03–2.03)    |
| Heart rate $> 100$ beats/min (versus $\leq 100$ beats/min)      | 1.36 (1.04–1.76)    |
| Symptom duration $> 3$ h (versus $\leq 3$ h)                    | 2.13 (1.73–2.62)    |
| <b>ECG Interpretation</b>                                       |                     |
| Definite STEMI (no LBBB)                                        | Reference           |
| Ambiguous STEMI (no LBBB)                                       | 4.07 (3.25–5.12)    |
| Left bundle branch block (versus absence)                       | 24.1 (17.81–32.89)  |
| <b>Charlson Comorbidity Index</b>                               |                     |
| Per 1 point increment                                           | 1.30 (1.21–1.40)    |
| Triage outside of regular work hours (versus during)            | 1.20 (0.98–1.47)    |
| Arrival by self-transport (versus ambulance)                    | 1.42 (1.13–1.78)    |
| <b>Type of Center</b>                                           |                     |
| PPCI center                                                     | Reference           |
| Transfer PPCI center                                            | 0.98 (0.75–1.29)    |
| Mixed center                                                    | 1.53 (1.16–2.02)    |
| Fibrinolysis center                                             | 3.10 (2.20–4.37)    |
| Period 2008–9 (versus 2006–7)                                   | 0.67 (0.54–0.82)    |

Abbreviations as in Table 1.

doi:10.1371/journal.pone.0104874.t002

patients unlikely to receive treatment. In the sensitivity analysis using a multilevel approach, the odds ratios and confidence intervals in Table 2 remained substantively unchanged.

### Predictors of Non-Receipt of Reperfusion Therapy by Type of Center (Table 3)

When the same predictive model of non-receipt of reperfusion therapy was applied by center type, the statistical discrimination was excellent ( $c$ -statistic  $\geq 0.87$ ). The models generally confirmed that the types of factors impacting non-receipt of reperfusion therapy were similar in all types of centers, with some possible heterogeneity in the estimates of association for female sex, ambiguous ECG and cohort period.

### Association of ECG Interpretation and Non-Receipt of Reperfusion Therapy by Type of Center (Table 4)

For patients with a definite STEMI ECG (and no LBBB), a statistically significant gradient for receipt of reperfusion therapy was observed, from over 95% of patients in PPCI centers to 85.5% in fibrinolysis centers, consistent with the degree of access to PPCI. When the ECG was ambiguous for STEMI (but no LBBB), a quarter of patients in PPCI centers did not receive reperfusion therapy compared to over half of patients presenting to exclusively fibrinolytic centers ( $p < 0.001$ ). Most patients with LBBB in all types of centers did not receive reperfusion therapy. However, a gradient based on accessibility to PPCI again appeared to be present: twice as many patients with LBBB in on-site PPCI and transfer PPCI centers (26.2%) received reperfusion compared with LBBB patients presenting to fibrinolysis and mixed centers (12.6%;  $p = 0.09$ ).

## Discussion

### Summary of Findings

This comprehensive, system-wide field evaluation of STEMI care allowed us to ascertain the clinical, ECG, and process-of-care characteristics that are associated with the non-receipt of reperfusion therapy. The main study findings are: (1) a substantial proportion of patients with STEMI/LBBB do not receive reperfusion therapy; (2) the likelihood of not receiving reperfusion therapy was a function of accessibility to PPCI, being least in PPCI centers and greatest in fibrinolysis centers; (3) uncertainty of STEMI on presenting ECGs (as suggested by expert ECG review) and presence of LBBB largely predict non-receipt of reperfusion therapy; and (4) the likelihood of not receiving reperfusion therapy in the presence of LBBB or an ECG that was ambiguous for STEMI was higher in centers far removed geographically from PPCI facilities.

### Study Strengths

Previous investigations, based on STEMI registries, have focused primarily on clinical characteristics of patients who have not received reperfusion therapy in PPCI centers [6,7,16,17]. However, many registries do not include all hospitals within a system of care nor necessarily recruit all STEMI/LBBB patients, raising questions of representativeness and generalizability of their findings [16–18]. Even when patients who are transferred in for PPCI from non-tertiary centers are included [6,7,19], patients who are not transferred are not identified. Moreover, registries tend not to have centralized ECG interpretation to standardize identification of all STEMI patients, and have not generally considered whether ECG characteristics – such as the degree of certainty of STEMI and the presence of LBBB – are associated with the likelihood of not receiving reperfusion treatment. Finally, previous



**Table 3.** Multivariate Predictors of Non-Receipt of Reperfusion Therapy, by Type of Center (N = 3730).

| Variable                                 | Odds Ratio (95% CI) |                       |                     |                      | Heterogeneity           |      |
|------------------------------------------|---------------------|-----------------------|---------------------|----------------------|-------------------------|------|
|                                          | PPCI Centers        | Transfer PPCI Centers | Mixed Centers       | Fibrinolysis Centers | I <sup>2</sup> (95% CI) | p    |
| Age (per 5-year increment)               | 1.31 (1.20–1.43)    | 1.20 (1.11–1.29)      | 1.16 (1.07–1.26)    | 1.27 (1.13–1.43)     | 36 (0–78)               | 0.32 |
| Female sex                               | 1.62 (1.01–2.59)    | 1.93 (1.32–2.83)      | 2.32 (1.52–3.55)    | 0.78 (0.39–1.52)     | 60 (0–87)               | 0.11 |
| Systolic blood pressure $\geq 100$ mm Hg | 1.98 (1.00–4.08)    | 2.09 (1.18–3.82)      | 0.95 (0.52–1.82)    | 1.02 (0.38–3.07)     | 31 (0–75)               | 0.36 |
| Heart rate $> 100$ beats/min             | 1.03 (0.60–1.75)    | 1.40 (0.90–2.13)      | 2.09 (1.25–3.47)    | 0.73 (0.28–1.80)     | 45 (0–82)               | 0.24 |
| Symptom duration $> 3$ h                 | 1.55 (1.01–2.36)    | 1.98 (1.38–2.86)      | 2.64 (1.77–3.95)    | 3.34 (1.85–6.12)     | 47 (0–82)               | 0.23 |
| <b>ECG Interpretation</b>                |                     |                       |                     |                      |                         |      |
| Ambiguous STEMI (no LBBB)                | 7.66 (4.77–12.56)   | 3.52 (2.34–5.35)      | 2.76 (1.81–4.22)    | 5.84 (3.17–10.90)    | 74 (27–91)              | 0.02 |
| Left bundle branch block                 | 34.82 (18.91–66.42) | 22.58 (13.82–37.65)   | 27.14 (14.46–53.65) | 24.32 (8.61–79.97)   | 0 (0–60)                | 0.89 |
| <b>Charlson Comorbidity Index</b>        |                     |                       |                     |                      |                         |      |
| Per 1 point increment                    | 1.34 (1.16–1.53)    | 1.3 (1.15–1.48)       | 1.32 (1.15–1.52)    | 1.36 (1.10–1.68)     | 0 (0–0)                 | 1.00 |
| Triage outside of regular work hours     | 1.69 (1.11–2.57)    | 1.14 (0.80–1.64)      | 0.96 (0.64–1.42)    | 1 (0.56–1.75)        | 29 (0–74)               | 0.38 |
| Arrival by self-transport                | 1.25 (0.78–2.00)    | 1.45 (0.98–2.16)      | 1.44 (0.93–2.23)    | 1.44 (0.79–2.64)     | 0 (0–0)                 | 0.99 |
| Period 2008–9 (versus 2006–7)            | 0.47 (0.30–0.72)    | 0.56 (0.38–0.82)      | 1.1 (0.74–1.65)     | 0.61 (0.34–1.08)     | 69 (9–89)               | 0.05 |

Abbreviations as in Table 1.

doi:10.1371/journal.pone.0104874.t003

studies have not focused on non-receipt of reperfusion therapy from the perspectives of hospital reperfusion strategy and PPCI accessibility.

The major strength of our study is its systematic and comprehensive recruitment of patients within a complete system of cardiac care that includes all centers regardless of their predominant reperfusion treatment and includes both patients who did and did not receive reperfusion, and patients who were not transferred. Other relatively novel strengths are the centralized ECG validation, the inclusion of patients with LBBB, the inclusion of transfer-in and transfer-out patients, and the inclusion of process-of-care variables in the analysis, such as time period of triage, means of transport to hospital, and hospital reperfusion practice as well as hospital STEMI volume. An important challenge in examining the problem of non-receipt of reperfusion treatment in patients with STEMI is how to define the patients eligible for reperfusion in terms of ECG characteristics. Without systematic centralized ECG reading, it is uncertain in a given study if all eligible STEMI patients have been identified; therefore, it cannot be certain that the patients who have not received reperfusion treatment have been correctly coded. Our study was designed to address this difficulty by requiring at least one of the two cardiologists at the core laboratory to confirm that STEMI was present. This also allowed us to dichotomize ECGs with STEMI into either definite or ambiguous categories.

### The Interplay of Clinical, ECG and Hospital Factors

Our study shows that patient and hospital characteristics both independently contribute to the likelihood of non-receipt of reperfusion treatment. Patient characteristics independently associated with non-receipt of reperfusion therapy included older age, female sex, high heart rate, higher Charlson index, and longer symptom duration. Two important and independent ECG predictors of not receiving reperfusion were LBBB and, in patients without LBBB, an ECG that appeared to be ambiguous for STEMI, as defined by a lack of consensus by 2 reviewing cardiologists. And in the presence of these ECG features in patients presenting with symptoms of AMI, the rate of reperfusion therapy was about twice as high in patients presenting to centers

with ready access to PPCI either because it was on site or because transfer for PPCI was a feasible option. This is consistent with guidelines recommending prompt coronary angiography when the diagnosis of STEMI is uncertain [20].

LBBB was present in 12.5% of the study cohort. Although it has been shown that the presence of LBBB in patients presenting with acute symptoms is a relatively insensitive marker of AMI [21], this finding does not strictly apply to our patients since the entry criteria in our field evaluation required a hospital discharge summary AMI diagnosis. Patients with LBBB comprised nearly half of our patients with AMI who did not receive reperfusion treatment. While older guidelines consistently recommended that patients with new or presumably new LBBB and characteristic symptoms receive reperfusion treatment just like patients with classic STEMI [1,2,20], more recent guidelines are conflicting [22,23]. Insofar as only 98 of 465 AMI patients with LBBB (21.1%) in our field evaluation actually received reperfusion treatment, from the perspective of the guidelines recommending that new or presumably new LBBB be treated as a STEMI equivalent, these findings appear to reveal an important treatment gap. On the other hand, despite the strength of the recommendation (Class IA) [20,23], the benefit of reperfusion therapy in patients with new or presumably new LBBB does not seem to have ever been prospectively tested. The recommendation is based on sub-group meta-analytic data from the Fibrinolytic Therapy Trialists' Collaborative Group [24], showing that patients with bundle branch block derived even greater absolute benefit from fibrinolysis than patients with classic ST-elevation. However, it is not known whether and in what proportions these patients with unspecified bundle branch block actually had LBBB versus right bundle branch block, new or presumed new or old bundle branch block, or ST-elevation or any more suggestive indications of STEMI on an ECG showing LBBB [25]. Therefore, the manifest reluctance of clinicians to treat patients with suspected myocardial infarction and LBBB with reperfusion therapy might be more due to a knowledge gap in the evidence base than to a treatment gap, *per se*. Indeed, these considerations, added to concern over both fibrinolytic risk and false system activation for PPCI in many patients presenting with acute symptoms and LBBB (who turn out

**Table 4.** Proportion of Patients With Receipt of Reperfusion Therapy (RT) and With Non-Receipt of Reperfusion Therapy (NRT) According to ECG Interpretation and Center Type (N = 3730).

| ECG Interpretation        | PPCI Centers (n = 1108) |           | Transfer PPCI Centers (n = 1231) |            | Mixed Centers (n = 996) |            | Fibrinolysis Centers (n = 395) |           | p      |
|---------------------------|-------------------------|-----------|----------------------------------|------------|-------------------------|------------|--------------------------------|-----------|--------|
|                           | RT (%)                  | NRT (%)   | RT (%)                           | NRT (%)    | RT (%)                  | NRT (%)    | RT (%)                         | NRT (%)   |        |
| Definite STEMI (no LBBB)  | 678 (95.2)              | 34 (4.8)  | 683 (93.1)                       | 51 (6.9)   | 558 (89.9)              | 63 (10.1)  | 235 (85.5)                     | 40 (14.5) | <0.001 |
| Ambiguous STEMI (no LBBB) | 217 (74.3)              | 75 (25.7) | 238 (76.5)                       | 73 (23.5)  | 174 (71.6)              | 69 (28.4)  | 37 (48.1)                      | 40 (51.9) | <0.001 |
| LBBB                      | 28 (26.9)               | 76 (73.1) | 48 (25.8)                        | 138 (74.2) | 16 (12.1)               | 116 (87.9) | 6 (14.0)                       | 37 (86.0) | 0.006  |

Abbreviations as in Table 1.  
Denominators for percentages in the Table are the number of patients presenting to each type of center with the ECG interpretation in question.  
doi:10.1371/journal.pone.0104874.t004

not to have an acutely occluded coronary artery), have resulted in the 2013 AHA/ACC STEMI guidelines questioning the notion of the LBBB-STEMI equivalent [22]. Because patients who present with myocardial infarction and LBBB are at extremely high risk [26] and only infrequently trigger a ‘reperfusion reflex’ on the part of clinicians, the question is raised whether the benefit of reperfusion treatment should not be prospectively tested perhaps using novel triage algorithms [21,27] in this relatively important and high-risk subset.

Apart from patients with LBBB, a quarter of study patients had a presenting ECG judged ambiguous for STEMI by the study cardiologists, and about one third of these patients did not receive any reperfusion treatment. These results underscore that an important proportion of patients with STEMI or presumptive STEMI have presenting ECGs where the diagnosis is not clear-cut, even for cardiologists [28]. Such findings suggest that an underappreciated reason for not receiving reperfusion therapy may be the understandable difficulty that physicians in emergency rooms face in the interpretation of these challenging ECGs, a difficulty that must be considerably greater than that encountered by cardiologists. Our findings point to the need for support systems enabling emergency physicians to have access to immediate and expert ECG opinion, and the importance of continuing education initiatives focused on challenging ECGs. While the helpfulness of expert advice may be questioned if the experts themselves do not always agree (as in this study), it should be noted that the study cardiologists based their retrospective evaluations of these ECGs in isolation from the patients’ acute clinical presentations. It is likely that immediate consultation in the presence of difficult acute ECGs – in which contextual clinical information is also shared – would be of considerable assistance to emergency physicians, and would decrease the rate of non-receipt of reperfusion therapy.

At the hospital level, the rate of non-receipt of reperfusion was higher in fibrinolysis centers. In addition to more difficult access to expert ECG interpretation, this finding is likely due to the real and perceived risks of bleeding, especially intra-cerebral hemorrhage, associated with fibrinolysis and far less so with PPCI. It would thus be expected that the threshold for initiating fibrinolysis would be higher than the decision to send a STEMI patient for PPCI. This latter option was precluded in these distant, low-volume centers.

### Cohort Period

In the second observation period, 2 years after the first, the proportion of patients who were not sent for PPCI and who did not receive fibrinolytic therapy decreased significantly by 15%. Indeed, the later period was associated in multivariate analysis with a third less chance of not receiving reperfusion treatment. This improvement may be attributed to greater physician awareness of the importance of not withholding reperfusion treatment from eligible patients. Publications highlighting this treatment gap and its adverse implications [3–5,7], the direct dissemination of findings from our first evaluation to all health regions and hospitals, our policy guidance document [29], as well as other research [30] and quality improvement initiatives in the province, are likely to have contributed to this salutary change. Interestingly, this improvement occurred in all types of centers except mixed perfusion treatment centers (Table 3). This might point to the difficulty of effecting change in centers that do not have a consistent reperfusion strategy.

### Study Limitations

We were unable to comprehensively measure other clinical or process-of-care variables that may be related to the decision not to provide reperfusion therapy. These include real and perceived

bleeding risks (especially for patients whose only reperfusion option, based on hospital type, is fibrinolysis), patient or family refusal, clinical judgment in fragile patients who often have considerable comorbidity that aggressive treatment would be futile or inappropriate, hospital STEMI protocols and the number of cardiologists, and the ratio of specialists to general practitioners per center. However, we likely did at least indirectly capture some of these reasons for non-receipt of reperfusion with several of our independent predictors, such as older age, higher Charlson index, and type of center. We did not integrate cardiac enzyme and biomarker data or coronary angiographic data in our analyses. Nevertheless, biomarker information is integral to physician and, by extension, ICD-10 AMI diagnosis [31] that was the starting point for our identification of STEMI patients. We did not characterize certain population-level factors like income, race and population density; however, their impact may be less important within a universal public health system. We only considered the first presenting ECG although we recognize that, in some clinical presentations, appropriate diagnosis and treatment require serial ECG analysis. Finally, with regard to LBBB, first, we could not discriminate between new and old LBBB, although we believe this distinction is of uncertain significance and, in practical terms, is generally problematic in the acute clinical setting. Second, while all LBBB patients in this field evaluation had a final diagnosis of AMI, we cannot exclude that at least some of them may not have had a STEMI (or non-STEMI) equivalent but rather heart failure with a rise in necrosis biomarkers. This limitation only underlines the challenge facing clinicians when patients with LBBB present with symptoms compatible with myocardial ischemia. A diagnostic coronary angiogram may be the only way to appropriately triage such high-risk patients and it is pertinent that in our study twice as many patients with LBBB received reperfusion treatment if timely accessibility to coronary catheterization was possible.

## References

- Kushner FG, Hand M, Smith SC Jr, King SB 3rd, Anderson JL, et al. (2009) American College of Cardiology Foundation/American Heart Association Task Force on Practice Guidelines 2009 Focused Updates: ACC/AHA Guidelines for the Management of Patients With ST-Elevation Myocardial Infarction (updating the 2004 Guideline and 2007 Focused Update) and ACC/AHA/SCAI Guidelines on Percutaneous Coronary Intervention (updating the 2005 Guideline and 2007 Focused Update): A report of the American College of Cardiology Foundation/American Heart Association Task Force on Practice Guidelines. *Circulation* 120: 2271–2306.
- Van de Werf F, Bax J, Betriu A, Blomstrom-Lundqvist C, Crea F, et al. (2008) ESC Committee for Practice Guidelines. Management of acute myocardial infarction in patients presenting with persistent ST-segment elevation: The Task Force on the Management of ST-Segment Elevation Acute Myocardial Infarction of the European Society of Cardiology. *Eur Heart J* 29: 2909–2945.
- Rajagopal V, Bhatt DL (2006) Gaps in myocardial infarction care: How might we best EFFECT change? *Eur Heart J* 27: 1513–1514.
- Balzi D, Barchielli A, Santoro GM, Carrabba N, Buiatti E, et al. (2008) AMI-Florence Working Group. Management of acute myocardial infarction in the real world: A summary report from The AMI-Florence Italian Registry. *Intern Emerg Med* 3: 109–115.
- Tricomi AJ, Magid DJ, Rumsfeld JS, Vinson DR, Lyons EE, et al. (2008) Emergency Department Quality in Myocardial Infarction (EDQMI) Study Investigators. Missed opportunities for reperfusion therapy for ST-segment elevation myocardial infarction: Results of the Emergency Department Quality in Myocardial Infarction (EDQMI) study. *Am Heart J* 155: 471–477.
- Gharacholou SM, Alexander KP, Chen AY, Wang TY, Melloni C, et al. (2010) Implications and reasons for the lack of use of reperfusion therapy in patients with ST-segment elevation myocardial infarction: Findings from the CRUSADE initiative. *Am Heart J* 159: 757–763.
- Eagle KA, Nallamothu BK, Mehta RH, Granger CB, Steg PG, et al. (2008) Global Registry of Acute Coronary Events (GRACE) Investigators. Trends in acute reperfusion therapy for ST-segment elevation myocardial infarction from 1999 to 2006: We are getting better but we have got a long way to go. *Eur Heart J* 29: 609–617.
- Lambert L, Brown K, Segal E, Brophy J, Rodes-Cabau J, et al. (2010) Association between timeliness of reperfusion therapy and clinical outcomes in ST-elevation myocardial infarction. *JAMA* 303: 2148–2155.
- Lambert LJ, Simard S, Carroll-Bilodeau C, Giguère M, Morin J, et al. (2009) Reliability of process measures of care of patients presenting with ST-elevation myocardial infarction (STEMI) abstracted by hospital health record librarians: Results of a field evaluation in Quebec, Canada [abstract 175]. *Circ Cardiovasc Qual Outcomes* 2: e40.
- Jollis JG, Al-Khalidi HR, Monk L, Roettig ML, Garvey JL, et al. (2012) Regional Approach to Cardiovascular Emergencies (RACE) Investigators Expansion of a regional ST-segment-elevation myocardial infarction system to an entire state. *Circulation* 126: 189–195.
- Lambert L, Blais C, Hamel D, Brown K, Rinfret S, et al. (2012) Evaluation of care and surveillance of cardiovascular disease: Can we trust medico-administrative hospital data? *Can J Cardiol* 28: 162–168.
- Deyo RA, Cherkin DC, Ciol MA (1992) Adapting a clinical comorbidity index for use with ICD-9-CM administrative databases. *J Clin Epidemiol* 45: 613–619.
- Hosmer DW, Lemeshow S, Sturdivant RX (2013) *Applied Logistic Regression*, 3<sup>rd</sup> edition. Hoboken, New Jersey: John Wiley & Sons, Inc. 500 p.
- Higgins JPT, Thompson SG (2002) Quantifying heterogeneity in a meta-analysis. *Stat Med* 21: 1539–1558.
- R Development Core Team (2010) R: A language and environment for statistical computing. Reference index, version 2.12.0. Vienna, Austria: R Foundation for Statistical Computing.
- Alter DA, Ko DT, Newman A, Tu JV (2006) Factors explaining the under-use of reperfusion therapy among ideal patients with ST-segment elevation myocardial infarction. *Eur Heart J* 27: 1539–1549.
- Forman DE, Chen AY, Wiviott SD, Wang TY, Magid DJ, et al. (2010) Comparison of outcomes in patients aged <75, 75 to 84, and ≥85 years with ST-elevation myocardial infarction (from the ACTION Registry-GWTG). *Am J Cardiol* 106: 1382–1388.
- Barron HV, Bowlby LJ, Breen T, Rogers WJ, Canto JG, et al. (1998) Use of reperfusion therapy for acute myocardial infarction in the United States: Data from the National Registry of Myocardial Infarction 2. *Circulation* 97: 1150–1156.
- Nallamothu BK, Bates ER, Herrin J, Wang Y, Bradley EH, et al. (2005) Times to treatment in transfer patients undergoing primary percutaneous coronary intervention in the United States: National Registry of Myocardial Infarction (NRM1)-3/4 analysis. *Circulation* 111: 761–767.

## Conclusions

In conclusion, by integrating clinical, ECG, and process-of-care data within a complete system of STEMI care, our novel field evaluation has furnished important and novel insights into the conundrum of patients with suspected STEMI who do not receive reperfusion treatment. An implication of this research is that the development of programs and training for emergency room physicians in order to correctly deal with ambiguous or difficult-to-interpret ECGs and LBBB is necessary, and should be tailored to a given hospital's proximity and access to coronary angiography centers. Awareness and greater understanding of these issues will likely improve patient care and reduce mortality in this important and very high-risk group.

## Acknowledgments

We gratefully acknowledge the contributions of the following (in alphabetical order): Christiane Beauchamp and Maude Giguère for supervision of data collection; Céline Carroll for project management; Dr. Jean E. Morin (McGill University Health Centre) for clinical input; Benedict Stuber-Gaumond and Rémy Thériault (Centre de recherche de l'Institut universitaire de cardiologie et de pneumologie de Québec) for creation of the Web site and database; and the executive and scientific committees of the Quebec Tertiary Cardiology Network for their critical review. We also thank the designated medical record librarians in the 82 participating hospitals across Quebec for data collection.

## Author Contributions

Conceived and designed the experiments: IJL JMB PB. Performed the experiments: IJL JN PB. Analyzed the data: KAB IJL JMB JN LJB PB. Wrote the paper: KAB IJL LJB PB. Statistical analysis: KAB. Interpretation of data: KAB IJL JMB JN SR ES SK DR RH SM LJB PB. Critical revision of the manuscript: KAB IJL JMB JN SR ES SK DR RH SM LJB PB.



20. Antman EM, Anbe DT, Armstrong PW, Bates ER, Green LA, et al. (2004) ACC/AHA guidelines for the management of patients with ST-elevation myocardial infarction; A report of the American College of Cardiology/American Heart Association Task Force on Practice Guidelines (Committee to Revise the 1999 Guidelines for the Management of patients with acute myocardial infarction). *J Am Coll Cardiol* 44: E1–E211.
21. Neeland IJ, Kontos MC, de Lemos JA (2012). Evolving considerations in the management of patients with left bundle branch block and suspected myocardial infarction. *J Am Coll Cardiol* 60: 96–105.
22. O'Gara PT, Kushner FG, Ascheim DD, Casey DE Jr, Chung MK, et al. (2013) American College of Emergency Physicians; Society for Cardiovascular Angiography and Interventions; 2013 ACCF/AHA guideline for the management of ST-elevation myocardial infarction: a report of the American College of Cardiology Foundation/American Heart Association Task Force on Practice Guidelines. *J Am Coll Cardiol* 61: e78–e140.
23. Steg PG, James SK, Atar D, Badano LP, Blömstrom-Lundqvist C, et al. (2012) Task Force on the management of ST-segment elevation acute myocardial infarction of the European Society of Cardiology (ESC); ESC Guidelines for the management of acute myocardial infarction in patients presenting with ST-segment elevation. *Eur Heart J* 33: 2569–2619.
24. Fibrinolytic Therapy Trialists' (FTT) Collaborative Group (1994) Indications for fibrinolytic therapy in suspected acute myocardial infarction: Collaborative overview of early mortality and major morbidity results from all randomised trials of more than 1000 patients. *Lancet* 343: 311–322.
25. Sgarbossa EB, Pinski SL, Barbagelata A, Underwood DA, Gates KB, et al. (1996) Electrocardiographic diagnosis of evolving acute myocardial infarction in the presence of left bundle-branch block. GUSTO-1 (Global Utilization of Streptokinase and Tissue Plasminogen Activator for Occluded Coronary Arteries) Investigators. *N Engl J Med* 334: 481–487.
26. Shlipak MG, Go AS, Frederick PD, Malmgren J, Barron HV, et al. (2000) Treatment and outcomes of left bundle-branch block patients with myocardial infarction who present without chest pain. National Registry of Myocardial Infarction 2 Investigators. *J Am Coll Cardiol* 36: 706–712.
27. Cai Q, Mehta N, Sgarbossa EB, Pinski SL, Wagner GS, et al. (2013) The left bundle-branch block puzzle in the 2013 ST-elevation myocardial infarction guideline: from falsely declaring emergency to denying reperfusion in a high-risk population. Are the Sgarbossa Criteria ready for prime time? *Am Heart J* 166: 409–413.
28. Tran V, Huang HD, Diez JG, Kalife G, Goswami R, et al. (2011) Differentiating ST-elevation myocardial infarction from nonischemic ST-elevation in patients with chest pain. *Am J Cardiol* 108: 1096–1101.
29. Agence d'évaluation des technologies et des modes d'intervention en santé (AETMIS) (2008) Infarctus aigu du myocarde avec élévation du segment ST (IAMEST): enjeux organisationnels et économiques de la prise en charge. Report prepared by Bogaty P, Boothroyd LJ, Lambert L, Lance J-MR, Paquette D. ETMIS 4(2): 1–114. Available: [http://www.inesss.qc.ca/fileadmin/doc/AETMIS/Rapports/Cardiologie/ETMIS2008\\_Vol4\\_No2.pdf](http://www.inesss.qc.ca/fileadmin/doc/AETMIS/Rapports/Cardiologie/ETMIS2008_Vol4_No2.pdf). Accessed 2014 June 18.
30. Huynh T, O'Loughlin J, Joseph L, Schampaert E, Rinfret S, et al. (2006) AMI-QUEBEC Study Investigators. Delays to reperfusion therapy in acute ST-segment elevation myocardial infarction: results from the AMI-QUEBEC Study. *CMAJ* 175: 1527–1532.
31. Kiyota Y, Schneeweiss S, Glynn RJ, Cannuscio CC, Avorn J, et al. (2004) Accuracy of Medicare claims-based diagnosis of acute myocardial infarction: estimating positive predictive value on the basis of review of hospital records. *Am Heart J* 148: 99–104.
